# Supplementary material for: Development and validation of next generation sequencing based 35-gene hereditary cancer panel
Source: Hered Cancer Clin Pract. 2020 Apr 28;18:9. doi: 10.1186/s13053-020-00141-2 (PMC7189534; doi:10.1186/s13053-020-00141-2)
Supplement: Supplementary file 1 — Additional file 1: Table S1. Known associations between genes in the 35-gene hereditary cancer panel and caner type. Table S2. Prenetics hereditary cancer panel reportable range. Table S3. Quality control metrics. Table S4. Exonic coverage of 35 hereditary cancer genes based on a benchmark sequencing run with 43 samples. Table S5. Summary of Coriell samples (1000 Genome) used for assessment of SNV and indel detection. Table S6. Summary of 53 Coriell samples used for assessment of SNV and indel detection and interpretation. Table S7. Technically challenging variants in the present validation. [file 13053_2020_141_MOESM1_ESM.xlsx]

## Sheet: Table S1
Table S1: Known associations between genes in the 35-gene hereditary cancer panel and caner type.
Gene	Breast	Ovarian	Uterine	Colorectal	Melanoma	Pancreatic	Stomach	Prostate*
APC				•		•	•
ATM	•			•		•	•	•
BAP1					•
BARD1	•
BMPR1A				•		•	•
BRCA1	•	•				•		•
BRCA2	•	•			•	•		•
BRIP1		•
CDH1	•			•			•
CDK4					•
CDKN2A					•	•
CHEK2	•			•				•
EPCAM		•	•	•		•	•
GREM1				•
MEN1						•	•
MITF					•
MLH1		•	•	•		•	•
MRE11A	•	•		•
MSH2		•	•	•		•	•
MSH6		•	•	•		•	•	•
MUTYH	•			•			•
NBN	•	•						•
PALB2	•	•				•		•
PMS1				•
PMS2		•	•	•		•	•	•
POLD1			•	•
POLE				•
PTEN	•		•	•	•
RAD50	•	•
RAD51C		•
RAD51D		•
SMAD4				•		•	•
STK11	•	•	•	•		•	•
TP53	•		•	•	•	•	•	•
XRCC2	•	•		•
This table depicts only primary cancer risks and does not specify other important gene-specific associated genes.

## Sheet: Table S2
Table S2: Prenetics hereditary cancer panel reportable range.
Gene	Transcript	Exons Sequenced
APC	NM_000038	2-16
ATM	NM_000051	2-63
BAP1	NM_004656	1-17
BARD1	NM_000465	1-11
BMPR1A	NM_004329	3-13
BRCA1	NM_007294	1-22
BRCA2	NM_000059	2-27
BRIP1	NM_032043	1-19
CDH1	NM_004360	1-16
CDK4	NM_000075	1-7
CDKN2A	NM_000077	1-3
CHEK2	NM_007194	1-14
EPCAM	NM_002354	1-9
GREM1	NM_013372	2
MEN1	NM_000244	1-9
MITF	NM_198159	1-10
MLH1	NM_000249	1-19
MRE11	NM_005591	1-19
MSH2	NM_000251	1-16
MSH6	NM_000179	1-10
MUTYH	NM_001048171	1-16
NBN	NM_002485	1-16
PALB2	NM_024675	1-13
PMS1	NM_000534	2-13
PMS2	NM_000535	1-15
POLD1	NM_001256849	2-27
POLE	NM_006231	1-49
PTEN	NM_000314	1-9
RAD50	NM_005732	1-25
RAD51C	NM_058216	1-9
RAD51D	NM_002878	1-10
SMAD4	NM_005359	2-12
STK11	NM_000455	1-9
TP53	NM_000546	1-10
XRCC2	NM_005431	1-3

## Sheet: Table S3
Table S3: Quality control metrics.
Category	Metrics	Acceptable Limit
Sample Quality	genomic DNA concentration	>2.5 ng/uL
Sample Quality	genomic DNA size after fragmentation	100-350bp
Sample Quality	Library concentration	>5ng/uL
Sample Quality	Library fragment size	300-800bp
Sample Quality	No template control product concentration	<1 ng/uL
Sequencing	Based quality > 30	>70% of bases
Mapping	Minimum number of reads at a called site	>=8
Mapping	The franction unique reads that pass vendor filter (PCT_PF_UQ_READS)	>0.8
Mapping	The mean coverage of target region (MEAN_TARGET_COVERAGE)	>50X
Mapping	The fraction of targets that did not reach coverage of 1X over any bases (ZERO_CVG_TARGETS_PCT)	<0.01
Mapping	The fraction of all target bases achieving 20X or greater coverage (PCT_TARGET_BASES_20X)	>0.99
Mapping	The fraction of all target bases achieving 30X or greater coverage (PCT_TARGET_BASES_30X)	>0.9
Mapping	The fraction of all target bases achieving 50X or greater coverage (PCT_TARGET_BASES_50X)	>0.9
Mapping	The fraction of unique bases that are aligned on or near a baited region (PCT_SELECTED_BASES)	>0.7 (for monitoring purpose)
Mapping	The fraction of unique bases that are mapped away from any baited region (PCT_OFF_BAIT)	<0.3 (for monitoring purpose)
Variant Calling	Z-score from Wilcoxon rank sum test of Alt vs. Ref read position bias	>= -20
Variant Calling	Phred-scaled confidence that the given genotype is true	>=20
Variant Calling	Difference between observed allele balance and 1 (for homozygotes) or 0.5 (for heterozygotes)	<0.25
Variant Calling	Normalized variant call confidence (GATK QD)	>2
Variant Calling	Phred-scaled likelihood of a non-ref allele existing at this position	>20
Variant Calling	MinIndelFrac	>0.25
Variant Calling	AB (difference between observed allele balance and 1 (for homozygotes) or 0.5 (for heterozygotes)	<0.25
Variant Calling	Phred-scaled p-value using Fisher's exact test to detect strand bias	<60
Variant (VCF level)	Number of variants	>=30 and <=75
Variant (VCF level)	Number of SNVs	>=30 and <=70
Variant (VCF level)	Number of indels	>=0 and <=5
Variant (VCF level)	Ratio of indel to SNVs	>=0 and <=0.1
Variant (VCF level)	Fraction of known variants	>=0.85 and <=1
Variant (VCF level)	Transition/transversion ratio	>=1.5 and <=6
Variant (VCF level)	Fraction of heterozygous variants	>=0.2 and <=0.85
Variant (VCF level)	Fraction of minor allele reads	>=0.42 and <=0.56
Variant (VCF level)	Cross sample contamination level (predicted)	<10%

## Sheet: Table S4
Table S4: Exonic coverage of 35 hereditary cancer genes based on a benchmark miseq run with 43 samples.
Gene	Average Coveragea	Minimum Coverageb	Maximum Coveragec
APC	431.743	355.402	513.234
ATM	446.062	511.193	347.596
BAP1	428.302	306.253	531.926
BARD1	443.445	522.973	203.511
BMPR1A	468.002	527.366	410.886
BRCA1	451.939	407.574	533.647
BRCA2	456.993	333.018	510.027
BRIP1	457.311	405.63	505.032
CDH1	430.388	87.7916	526.583
CDK4	473.623	382.92	506.861
CDKN2A	305.37	231.491	353.026
CHEK2	420.168	283.276	496.072
EPCAM	415.186	217.158	487.779
GREM1	467.017	467.017	467.017
MEN1	400.545	350.337	430.868
MITF	462.77	409.653	501.63
MLH1	446.009	407.471	481.623
MRE11	443.473	365.55	516.588
MSH2	432.784	264.032	485.247
MSH6	446.847	227.765	518.514
MUTYH	418.776	283.103	514.282
NBN	447.368	345.52	498.576
PALB2	463.901	340.374	518.149
PMS1	455.747	388.272	574.149
PMS2	419.554	270.374	531.471
POLD1	338.749	137.528	490.293
POLE	419.065	91.4128	512.279
PTEN	417.117	304.753	478.312
RAD50	438.143	296.526	512.662
RAD51C	438.854	392.549	486.652
RAD51D	393.508	245.909	459.351
SMAD4	463.997	369.625	520.336
STK11	362.485	228.325	452.813
TP53	426.753	342.416	535.977
XRCC2	415.405	357.213	481.341
aAverage coverage across all reportable exons in the gene
bMinimum coverage across all reportable exons in the gene
cMaximum coverage across all reportable exons in the gene

## Sheet: Table S5
Table S5: Summary of Coriell samples (1000 Genome) used for assessment of SNV and indel detection.
ID	Description
HG00366	1000 GENOMES PROJECT - FINNISH IN FINLAND
HG00367	1000 GENOMES PROJECT - FINNISH IN FINLAND
HG00625	1000 GENOMES PROJECT - HAN CHINESE SOUTH, CHINA
HG00626	1000 GENOMES PROJECT - HAN CHINESE SOUTH, CHINA
HG00628	1000 GENOMES PROJECT - HAN CHINESE SOUTH, CHINA
HG00629	1000 GENOMES PROJECT - HAN CHINESE SOUTH, CHINA
HG00634	1000 GENOMES PROJECT - HAN CHINESE SOUTH, CHINA
HG00650	1000 GENOMES PROJECT - HAN CHINESE SOUTH, CHINA
HG00651	1000 GENOMES PROJECT - HAN CHINESE SOUTH, CHINA
HG00653	1000 GENOMES PROJECT - HAN CHINESE SOUTH, CHINA
HG00654	1000 GENOMES PROJECT - HAN CHINESE SOUTH, CHINA
HG00656	1000 GENOMES PROJECT - HAN CHINESE SOUTH, CHINA
HG00657	1000 GENOMES PROJECT - HAN CHINESE SOUTH, CHINA
HG00662	1000 GENOMES PROJECT - HAN CHINESE SOUTH, CHINA
HG00663	1000 GENOMES PROJECT - HAN CHINESE SOUTH, CHINA
HG00671	1000 GENOMES PROJECT - HAN CHINESE SOUTH, CHINA
HG00672	1000 GENOMES PROJECT - HAN CHINESE SOUTH, CHINA
HG00683	1000 GENOMES PROJECT - HAN CHINESE SOUTH, CHINA
HG00684	1000 GENOMES PROJECT - HAN CHINESE SOUTH, CHINA
HG00689	1000 GENOMES PROJECT - HAN CHINESE SOUTH, CHINA
HG00690	1000 GENOMES PROJECT - HAN CHINESE SOUTH, CHINA
HG00692	1000 GENOMES PROJECT - HAN CHINESE SOUTH, CHINA
HG00693	1000 GENOMES PROJECT - HAN CHINESE SOUTH, CHINA
HG00698	1000 GENOMES PROJECT - HAN CHINESE SOUTH, CHINA
HG00699	1000 GENOMES PROJECT - HAN CHINESE SOUTH, CHINA
HG00701	1000 GENOMES PROJECT - HAN CHINESE SOUTH, CHINA
HG00705	1000 GENOMES PROJECT - HAN CHINESE SOUTH, CHINA
HG00707	1000 GENOMES PROJECT - HAN CHINESE SOUTH, CHINA
HG00708	1000 GENOMES PROJECT - HAN CHINESE SOUTH, CHINA
HG01389	1000 GENOMES PROJECT - COLOMBIAN IN MEDELLIN, COLOMBIA
HG01501	1000 GENOMES PROJECT - IBERIAN POPULATIONS IN SPAIN
HG02521	1000 GENOMES PROJECT - KINH IN HO CHI MINH CITY, VIETNAM
HG02522	1000 GENOMES PROJECT - KINH IN HO CHI MINH CITY, VIETNAM
NA06994	INTERNATIONAL HAPMAP PROJECT - CEPH [UTAH RESIDENTS WITH ANCESTRY FROM NORTHERN AND WESTERN EUROPE]
NA07347	INTERNATIONAL HAPMAP PROJECT - CEPH [UTAH RESIDENTS WITH ANCESTRY FROM NORTHERN AND WESTERN EUROPE]
NA07357	INTERNATIONAL HAPMAP PROJECT - CEPH [UTAH RESIDENTS WITH ANCESTRY FROM NORTHERN AND WESTERN EUROPE]
NA10847	INTERNATIONAL HAPMAP PROJECT - CEPH [UTAH RESIDENTS WITH ANCESTRY FROM NORTHERN AND WESTERN EUROPE]
NA11830	INTERNATIONAL HAPMAP PROJECT - CEPH [UTAH RESIDENTS WITH ANCESTRY FROM NORTHERN AND WESTERN EUROPE]
NA11840	INTERNATIONAL HAPMAP PROJECT - CEPH [UTAH RESIDENTS WITH ANCESTRY FROM NORTHERN AND WESTERN EUROPE]
NA11843	INTERNATIONAL HAPMAP PROJECT - CEPH [UTAH RESIDENTS WITH ANCESTRY FROM NORTHERN AND WESTERN EUROPE]
NA11881	INTERNATIONAL HAPMAP PROJECT - CEPH [UTAH RESIDENTS WITH ANCESTRY FROM NORTHERN AND WESTERN EUROPE]
NA11992	INTERNATIONAL HAPMAP PROJECT - CEPH [UTAH RESIDENTS WITH ANCESTRY FROM NORTHERN AND WESTERN EUROPE]
NA11994	INTERNATIONAL HAPMAP PROJECT - CEPH [UTAH RESIDENTS WITH ANCESTRY FROM NORTHERN AND WESTERN EUROPE]
NA11995	INTERNATIONAL HAPMAP PROJECT - CEPH [UTAH RESIDENTS WITH ANCESTRY FROM NORTHERN AND WESTERN EUROPE]
NA12006	INTERNATIONAL HAPMAP PROJECT - CEPH [UTAH RESIDENTS WITH ANCESTRY FROM NORTHERN AND WESTERN EUROPE]
NA12154	INTERNATIONAL HAPMAP PROJECT - CEPH [UTAH RESIDENTS WITH ANCESTRY FROM NORTHERN AND WESTERN EUROPE]
NA12717	INTERNATIONAL HAPMAP PROJECT - CEPH [UTAH RESIDENTS WITH ANCESTRY FROM NORTHERN AND WESTERN EUROPE]
NA12878	INTERNATIONAL HAPMAP PROJECT - CEPH [UTAH RESIDENTS WITH ANCESTRY FROM NORTHERN AND WESTERN EUROPE]
NA12889	INTERNATIONAL HAPMAP PROJECT - CEPH [UTAH RESIDENTS WITH ANCESTRY FROM NORTHERN AND WESTERN EUROPE]
NA12890	INTERNATIONAL HAPMAP PROJECT - CEPH [UTAH RESIDENTS WITH ANCESTRY FROM NORTHERN AND WESTERN EUROPE]
NA18525	INTERNATIONAL HAPMAP PROJECT - HAN CHINESE IN BEIJING, CHINA
NA18530	INTERNATIONAL HAPMAP PROJECT - HAN CHINESE IN BEIJING, CHINA
NA18534	INTERNATIONAL HAPMAP PROJECT - HAN CHINESE IN BEIJING, CHINA
NA18543	INTERNATIONAL HAPMAP PROJECT - HAN CHINESE IN BEIJING, CHINA
NA18544	INTERNATIONAL HAPMAP PROJECT - HAN CHINESE IN BEIJING, CHINA
NA18546	INTERNATIONAL HAPMAP PROJECT - HAN CHINESE IN BEIJING, CHINA
NA18548	INTERNATIONAL HAPMAP PROJECT - HAN CHINESE IN BEIJING, CHINA
NA18557	INTERNATIONAL HAPMAP PROJECT - HAN CHINESE IN BEIJING, CHINA
NA18558	INTERNATIONAL HAPMAP PROJECT - HAN CHINESE IN BEIJING, CHINA
NA18559	INTERNATIONAL HAPMAP PROJECT - HAN CHINESE IN BEIJING, CHINA
NA18561	INTERNATIONAL HAPMAP PROJECT - HAN CHINESE IN BEIJING, CHINA
NA18562	INTERNATIONAL HAPMAP PROJECT - HAN CHINESE IN BEIJING, CHINA
NA18563	INTERNATIONAL HAPMAP PROJECT - HAN CHINESE IN BEIJING, CHINA
NA18572	INTERNATIONAL HAPMAP PROJECT - HAN CHINESE IN BEIJING, CHINA
NA18603	INTERNATIONAL HAPMAP PROJECT - HAN CHINESE IN BEIJING, CHINA
NA18605	INTERNATIONAL HAPMAP PROJECT - HAN CHINESE IN BEIJING, CHINA
NA18606	INTERNATIONAL HAPMAP PROJECT - HAN CHINESE IN BEIJING, CHINA
NA18608	INTERNATIONAL HAPMAP PROJECT - HAN CHINESE IN BEIJING, CHINA
NA18609	INTERNATIONAL HAPMAP PROJECT - HAN CHINESE IN BEIJING, CHINA
NA18612	INTERNATIONAL HAPMAP PROJECT - HAN CHINESE IN BEIJING, CHINA
NA18613	INTERNATIONAL HAPMAP PROJECT - HAN CHINESE IN BEIJING, CHINA
NA18620	INTERNATIONAL HAPMAP PROJECT - HAN CHINESE IN BEIJING, CHINA
NA18621	INTERNATIONAL HAPMAP PROJECT - HAN CHINESE IN BEIJING, CHINA
NA18622	INTERNATIONAL HAPMAP PROJECT - HAN CHINESE IN BEIJING, CHINA
NA18623	INTERNATIONAL HAPMAP PROJECT - HAN CHINESE IN BEIJING, CHINA
NA18624	INTERNATIONAL HAPMAP PROJECT - HAN CHINESE IN BEIJING, CHINA
NA18629	INTERNATIONAL HAPMAP PROJECT - HAN CHINESE IN BEIJING, CHINA
NA18873	INTERNATIONAL HAPMAP PROJECT - YORUBA IN IBADAN, NIGERIA
NA18945	INTERNATIONAL HAPMAP PROJECT - JAPANESE IN TOKYO, JAPAN
NA18952	INTERNATIONAL HAPMAP PROJECT - JAPANESE IN TOKYO, JAPAN
NA18953	INTERNATIONAL HAPMAP PROJECT - JAPANESE IN TOKYO, JAPAN
NA18968	INTERNATIONAL HAPMAP PROJECT - JAPANESE IN TOKYO, JAPAN
NA18969	INTERNATIONAL HAPMAP PROJECT - JAPANESE IN TOKYO, JAPAN
NA18981	INTERNATIONAL HAPMAP PROJECT - JAPANESE IN TOKYO, JAPAN
NA18992	INTERNATIONAL HAPMAP PROJECT - JAPANESE IN TOKYO, JAPAN
NA19129	INTERNATIONAL HAPMAP PROJECT - YORUBA IN IBADAN, NIGERIA
NA19138	INTERNATIONAL HAPMAP PROJECT - YORUBA IN IBADAN, NIGERIA
NA19144	INTERNATIONAL HAPMAP PROJECT - YORUBA IN IBADAN, NIGERIA
NA19204	INTERNATIONAL HAPMAP PROJECT - YORUBA IN IBADAN, NIGERIA
NA19210	INTERNATIONAL HAPMAP PROJECT - YORUBA IN IBADAN, NIGERIA
NA19921	INTERNATIONAL HAPMAP PROJECT - AFRICAN ANCESTRY IN SOUTHWEST USA
NA20289	INTERNATIONAL HAPMAP PROJECT - AFRICAN ANCESTRY IN SOUTHWEST USA
NA20332	INTERNATIONAL HAPMAP PROJECT - AFRICAN ANCESTRY IN SOUTHWEST USA
NA20891	INTERNATIONAL HAPMAP PROJECT - GUJARATI INDIANS IN HOUSTON, TEXAS, USA

## Sheet: Table S6
Table S6: Summary of 53 Coriell samples used for assessment of SNV and indel detection and interpretation.
ID	Description	Gene
NA11410	FAMILIAL ADENOMATOUS POLYPOSIS 1; FAP1 | APC GENE	APC
NA03223	FAMILIAL ADENOMATOUS POLYPOSIS 1; FAP1	APC
NA02633	TURCOT SYNDROME | FAMILIAL ADENOMATOUS POLYPOSIS 1; FAP1	APC
NA07517	FAMILIAL ADENOMATOUS POLYPOSIS 1; FAP1	APC
NA03189	ATAXIA-TELANGIECTASIA; AT | ATAXIA-TELANGIECTASIA MUTATED GENE; ATM	ATM
NA13907	ATAXIA-TELANGIECTASIA; AT | ATAXIA-TELANGIECTASIA MUTATED GENE; ATM	ATM
NA13802	ATAXIA-TELANGIECTASIA; AT | ATAXIA-TELANGIECTASIA MUTATED GENE; ATM	ATM
NA11254	ATAXIA-TELANGIECTASIA; AT | ATAXIA-TELANGIECTASIA MUTATED GENE; ATM	ATM
NA13868	ATAXIA-TELANGIECTASIA; AT | ATAXIA-TELANGIECTASIA MUTATED GENE; ATM	ATM
NA11265	ATAXIA-TELANGIECTASIA; AT | ATAXIA-TELANGIECTASIA MUTATED GENE; ATM	ATM
NA21849	ATAXIA-TELANGIECTASIA; AT | ATAXIA-TELANGIECTASIA MUTATED GENE; ATM	ATM
NA14067	ATAXIA-TELANGIECTASIA; AT | ATAXIA-TELANGIECTASIA MUTATED GENE; ATM	ATM
NA13906	ATAXIA-TELANGIECTASIA; AT | ATAXIA-TELANGIECTASIA MUTATED GENE; ATM	ATM
NA08436	ATAXIA-TELANGIECTASIA; AT | ATAXIA-TELANGIECTASIA MUTATED GENE; ATM	ATM
NA13910	ATAXIA-TELANGIECTASIA; AT | ATAXIA-TELANGIECTASIA MUTATED GENE; ATM	ATM
NA11255	ATAXIA-TELANGIECTASIA; AT | ATAXIA-TELANGIECTASIA MUTATED GENE; ATM	ATM
NA13765	ATAXIA-TELANGIECTASIA; AT | ATAXIA-TELANGIECTASIA MUTATED GENE; ATM	ATM
NA14451	ATAXIA-TELANGIECTASIA; AT | ATAXIA-TELANGIECTASIA MUTATED GENE; ATM	ATM
NA09587	ATAXIA-TELANGIECTASIA; AT | ATAXIA-TELANGIECTASIA MUTATED GENE; ATM	ATM
NA02052	ATAXIA-TELANGIECTASIA; AT | ATAXIA-TELANGIECTASIA MUTATED GENE; ATM	ATM
NA03332	ATAXIA-TELANGIECTASIA; AT | ATAXIA-TELANGIECTASIA MUTATED GENE; ATM	ATM
NA13973	ATAXIA-TELANGIECTASIA; AT | ATAXIA-TELANGIECTASIA MUTATED GENE; ATM	ATM
NA13661	ATAXIA-TELANGIECTASIA; AT | ATAXIA-TELANGIECTASIA MUTATED GENE; ATM	ATM
NA13691	ATAXIA-TELANGIECTASIA; AT | ATAXIA-TELANGIECTASIA MUTATED GENE; ATM	ATM
NA01526	ATAXIA-TELANGIECTASIA; AT | ATAXIA-TELANGIECTASIA MUTATED GENE; ATM | TRANSLOCATED CHROMOSOME	ATM
NA13715	BREAST CANCER, TYPE 1; BRCA1 | BREAST CANCER INFORMATION CORE (BIC) BRCA1/BRCA2 MUTATION PANEL DNA SAMPLES	BRCA1
NA13714	BREAST CANCER, TYPE 1; BRCA1	BRCA1
NA14093	BREAST CANCER, TYPE 1; BRCA1	BRCA1
NA14090	BREAST CANCER, TYPE 1; BRCA1 | BREAST CANCER INFORMATION CORE (BIC) BRCA1/BRCA2 MUTATION PANEL DNA SAMPLES	BRCA1
NA13709	BREAST CANCER, TYPE 1; BRCA1	BRCA1
NA13712	BREAST CANCER, TYPE 1; BRCA1	BRCA1
NA13705	BREAST CANCER, TYPE 1; BRCA1 | BREAST CANCER INFORMATION CORE (BIC) BRCA1/BRCA2 MUTATION PANEL DNA SAMPLES	BRCA1
NA14095	BREAST CANCER, TYPE 1; BRCA1	BRCA1
NA14636	BREAST CANCER, TYPE 1; BRCA1 | BREAST CANCER INFORMATION CORE (BIC) BRCA1/BRCA2 MUTATION PANEL DNA SAMPLES	BRCA1
NA14684	BREAST CANCER, TYPE 1; BRCA1 | BREAST CANCER INFORMATION CORE (BIC) BRCA1/BRCA2 MUTATION PANEL DNA SAMPLES	BRCA1
NA14097	BREAST CANCER, TYPE 1; BRCA1	BRCA1
NA13713	BREAST CANCER, TYPE 1; BRCA1	BRCA1
NA13711	BREAST CANCER, TYPE 1; BRCA1	BRCA1
NA13708	BREAST CANCER, TYPE 1; BRCA1	BRCA1
NA14092	BREAST CANCER, TYPE 1; BRCA1	BRCA1
NA14094	BREAST CANCER, TYPE 1; BRCA1 | BREAST CANCER INFORMATION CORE (BIC) BRCA1/BRCA2 MUTATION PANEL DNA SAMPLES	BRCA1
NA14634	BREAST CANCER, TYPE 1; BRCA1 | BREAST CANCER INFORMATION CORE (BIC) BRCA1/BRCA2 MUTATION PANEL DNA SAMPLES	BRCA1
NA14637	BREAST CANCER, TYPE 1; BRCA1 | BREAST CANCER INFORMATION CORE (BIC) BRCA1/BRCA2 MUTATION PANEL DNA SAMPLES	BRCA1
NA14170	BREAST CANCER 2, EARLY-ONSET; BRCA2 | BREAST CANCER INFORMATION CORE (BIC) BRCA1/BRCA2 MUTATION PANEL DNA SAMPLES	BRCA2
NA14788	BREAST CANCER 2, EARLY-ONSET; BRCA2	BRCA2
NA14626	BREAST CANCER 2, EARLY-ONSET; BRCA2 | BREAST CANCER INFORMATION CORE (BIC) BRCA1/BRCA2 MUTATION PANEL DNA SAMPLES	BRCA2
NA14623	BREAST CANCER 2, EARLY-ONSET; BRCA2 | BREAST CANCER INFORMATION CORE (BIC) BRCA1/BRCA2 MUTATION PANEL DNA SAMPLES	BRCA2
NA14622	BREAST CANCER 2, EARLY-ONSET; BRCA2 | BREAST CANCER INFORMATION CORE (BIC) BRCA1/BRCA2 MUTATION PANEL DNA SAMPLES	BRCA2
NA14624	BREAST CANCER 2, EARLY-ONSET; BRCA2 | BREAST CANCER INFORMATION CORE (BIC) BRCA1/BRCA2 MUTATION PANEL DNA SAMPLES	BRCA2
NA14805	BREAST CANCER 2, EARLY-ONSET; BRCA2	BRCA2
NA16533	MELANOMA, CUTANEOUS MALIGNANT, 2; CMM2 | CYCLIN-DEPENDENT KINASE INHIBITOR 2A; CDKN2A	CDKN2A
NA11630	MULTIPLE ENDOCRINE NEOPLASIA, TYPE I; MEN1	MEN1
NA10080	COWDEN DISEASE; CD | PHOSPHATASE AND TENSIN HOMOLOG; PTEN	PTEN

## Sheet: Table S7
Table S7: Technically challenging variants in validation
ID	Gene	Technically Challenging Variants Type	Mutations	Sanger
NA11255	ATM	Complex Indel Variant	8565TG>AA	Confirmed
NA14094	BRCA1	Indel > 10 bp	40-BP DEL, FS397TER	Confirmed
NA16533	CDKN2A	Indel > 10 bp	19-BP DEL	Confirmed
NA21849	ATM	Complex Indel Variant	3245ATC>TGAT	Confirmed
